# Supplementary material for: Immune intrinsic escape signature stratifies prognosis, characterizes the tumor immune microenvironment, and identifies tumorigenic PPP1R8 in glioblastoma multiforme patients
Source: Front Immunol. 2025 Aug 6;16:1577920. doi: 10.3389/fimmu.2025.1577920 (PMC12364687; doi:10.3389/fimmu.2025.1577920)
Supplement: Supplementary Table 3 — Significantly enriched KEGG pathways associated with overall survival-related immune escape genes. [file Table3.xlsx]

## Sheet: Sheet1
Term	P-value	Adjusted P-value
IL-6/JAK/STAT3 Signaling	3.11642e-14	8.10269e-13
Interferon Gamma Response	2.06851e-09	2.68907e-08
Apoptosis	9.78694e-06	8.48201e-05
Allograft Rejection	2.78681e-05	0.000181143
TNF-alpha Signaling via NF-kB	0.000444895	0.00165247
Complement	0.000444895	0.00165247
Inflammatory Response	0.000444895	0.00165247
Interferon Alpha Response	0.000703029	0.00228484
UV Response Up	0.00285276	0.00824131
PI3K/AKT/mTOR Signaling	0.0153132	0.0398143
