# Supplementary material for: Immune intrinsic escape signature stratifies prognosis, characterizes the tumor immune microenvironment, and identifies tumorigenic PPP1R8 in glioblastoma multiforme patients
Source: Front Immunol. 2025 Aug 6;16:1577920. doi: 10.3389/fimmu.2025.1577920 (PMC12364687; doi:10.3389/fimmu.2025.1577920)
Supplement: Supplementary Table 4 — Comparison of predictive performance between IEScore and two published Interferon-related gene signatures using time-dependent AUC analysis. [file Table4.xlsx]

## Sheet: AUC_Scores
Times	Models	AUC (%)
0.5	IEScore	53.3 [47.2;59.5]
0.5	IFNGrGS	49.4 [43.5;55.3]
0.5	IFN_sig	52.3 [46.4;58.1]
1	IEScore	57.6 [52.4;62.7]
1	IFNGrGS	53.1 [47.9;58.4]
1	IFN_sig	59.0 [53.9;64.1]
1.5	IEScore	61.3 [55.8;66.7]
1.5	IFNGrGS	48.5 [42.9;54.1]
1.5	IFN_sig	57.8 [52.2;63.4]
2	IEScore	68.0 [59.8;71.9]
2	IFNGrGS	51.1 [44.7;57.5]
2	IFN_sig	59.6 [53.1;66.1]
2.5	IEScore	67.5 [60.3;74.6]
2.5	IFNGrGS	50.9 [42.9;58.9]
2.5	IFN_sig	57.5 [49.2;65.9]
3	IEScore	73.0 [61.2;77.3]
3	IFNGrGS	48.0 [38.8;57.1]
3	IFN_sig	55.9 [46.5;65.2]
3.5	IEScore	70.2 [61.4;79.1]
3.5	IFNGrGS	48.3 [37.9;58.7]
3.5	IFN_sig	55.4 [45.2;65.6]
4	IEScore	69.1 [58.6;79.6]
4	IFNGrGS	46.4 [34.4;58.4]
4	IFN_sig	57.7 [45.7;69.7]
4.5	IEScore	70.2 [58.5;81.8]
4.5	IFNGrGS	49.7 [36.1;63.4]
4.5	IFN_sig	59.0 [45.4;72.6]
5	IEScore	76.0 [62.1;84.8]
5	IFNGrGS	54.1 [39.4;68.8]
5	IFN_sig	59.5 [44.2;74.8]

## Sheet: Contrasts
Times	Models	Reference	delta AUC (%)	p-value
0.5	IFN_sig	IEScore	-1.1 [-8.1;5.9]	0.762366
1	IFN_sig	IEScore	1.4 [-4.7;7.5]	0.652087
1.5	IFN_sig	IEScore	-3.5 [-10.1;3.2]	0.31054
2	IFN_sig	IEScore	-6.2 [-14.0;1.5]	0.114961
2.5	IFN_sig	IEScore	-9.9 [-19.3;-0.6]	0.036919
3	IFN_sig	IEScore	-13.4 [-23.7;-3.1]	0.010602
3.5	IFN_sig	IEScore	-14.8 [-26.1;-3.5]	0.010097
4	IFN_sig	IEScore	-11.4 [-25.4;2.7]	0.113269
4.5	IFN_sig	IEScore	-11.2 [-26.1;3.7]	0.141362
5	IFN_sig	IEScore	-14.0 [-29.5;1.5]	0.077553
0.5	IFNGrGS	IEScore	-3.9 [-9.9;2.0]	0.194197
1	IFNGrGS	IEScore	-4.5 [-9.7;0.7]	0.092444
1.5	IFNGrGS	IEScore	-12.7 [-18.3;-7.1]	< 0.001
2	IFNGrGS	IEScore	-14.7 [-21.5;-8.0]	< 0.001
2.5	IFNGrGS	IEScore	-16.6 [-24.3;-8.8]	< 0.001
3	IFNGrGS	IEScore	-21.3 [-29.3;-13.2]	< 0.001
3.5	IFNGrGS	IEScore	-21.9 [-30.9;-13.0]	< 0.001
4	IFNGrGS	IEScore	-22.7 [-33.1;-12.2]	< 0.001
4.5	IFNGrGS	IEScore	-20.5 [-32.8;-8.1]	0.001195
5	IFNGrGS	IEScore	-19.3 [-31.2;-7.4]	0.001444
0.5	IFNGrGS	IFN_sig	-2.9 [-9.7;4.0]	0.415946
1	IFNGrGS	IFN_sig	-5.9 [-11.9;0.2]	0.056081
1.5	IFNGrGS	IFN_sig	-9.3 [-15.8;-2.7]	0.0055
2	IFNGrGS	IFN_sig	-8.5 [-16.3;-0.7]	0.032655
2.5	IFNGrGS	IFN_sig	-6.6 [-16.8;3.5]	0.201606
3	IFNGrGS	IFN_sig	-7.9 [-18.6;2.9]	0.151018
3.5	IFNGrGS	IFN_sig	-7.1 [-19.2;5.1]	0.253216
4	IFNGrGS	IFN_sig	-11.3 [-25.9;3.3]	0.12921
4.5	IFNGrGS	IFN_sig	-9.3 [-25.8;7.3]	0.272269
5	IFNGrGS	IFN_sig	-5.4 [-23.3;12.6]	0.559687
